# Supplementary material
Source: Springer Nature journal article supplement (https://www.springermedizin.de/resource/supplementary/13075_2013_4016_MOESM2_ESM.pdf/9695888)
Supplement: MOESM2 [file 9695888]

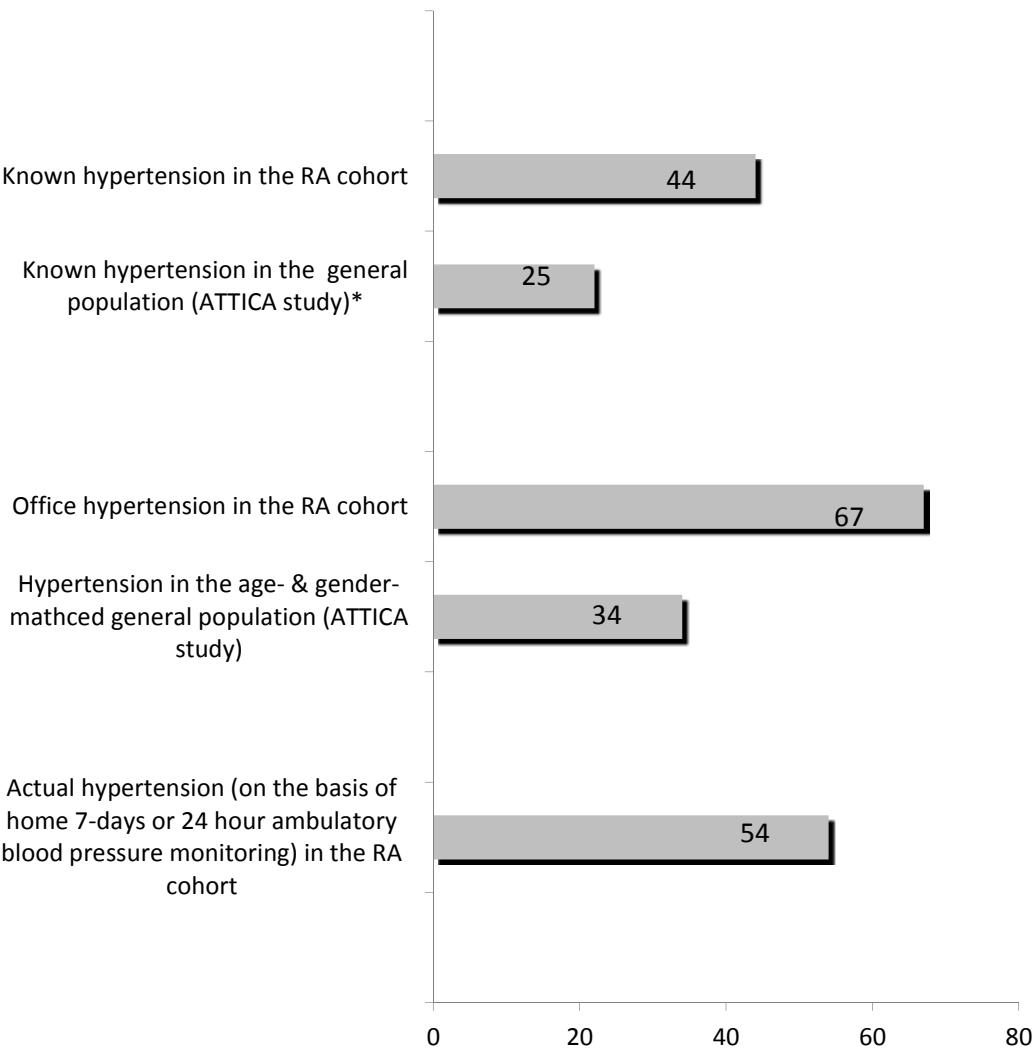

Known hypertension in the RA cohort

44

Known hypertension in the general population (ATTICA study)\*

25

Office hypertension in the RA cohort

67

Hypertension in the age- & gender-matched general population (ATTICA study)

34

Actual hypertension (on the basis of home 7-days or 24 hour ambulatory blood pressure monitoring) in the RA cohort

54

0 20 40 60 80
